# Supplementary material for: Study on the cycling performance of LiNi0.5Mn1.5O4 electrodes modified by reactive SiO2 nanoparticles
Source: Royal Society of Chemistry journal article supplement (doi:10.1039/c3ta14558a), 2014-01-01
Supplement: c3ta14558a1.pdf [file c3ta14558a1.pdf]

## **Electronic Supplementary Information**

### **Study on the cycling performance of $\text{LiNi}_{0.5}\text{Mn}_{1.5}\text{O}_4$ electrodes modified by reactive $\text{SiO}_2$ nanoparticles**

Won-Kyung Shin, Yoon-Sung Lee, and Dong-Won Kim\*

Department of Chemical Engineering, Hanyang University, Seoul 133-791, Korea

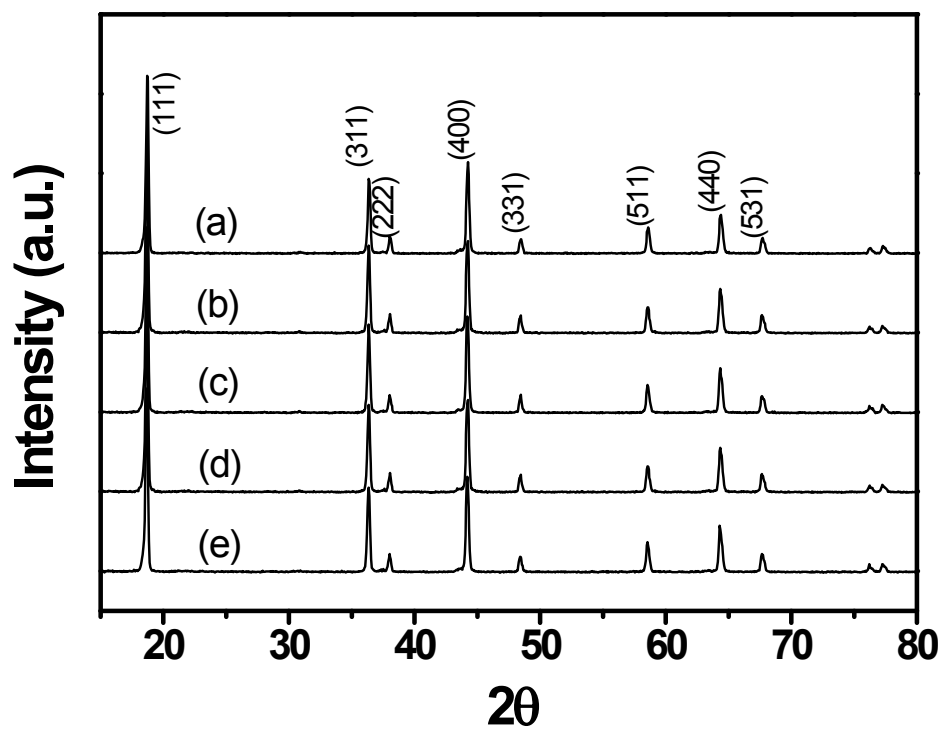

**Fig. S1.** XRD patterns of (a) pristine LiNi<sub>0.5</sub>Mn<sub>1.5</sub>O<sub>4</sub> materials, and SiO<sub>2</sub>-decorated LiNi<sub>0.5</sub>Mn<sub>1.5</sub>O<sub>4</sub> materials with SiO<sub>2</sub> nanoparticles of (b) 1 wt.%, (c) 2 wt.%, (d) 3 wt.% and (e) 4 wt.%.

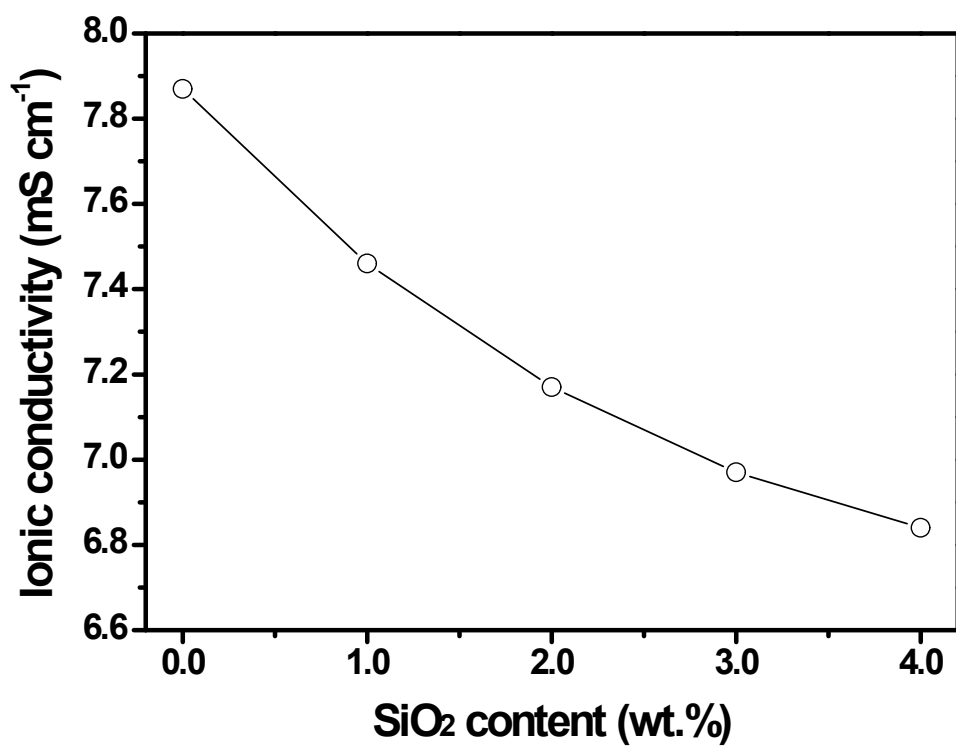

**Fig. S2.** Ionic conductivities of composite polymer layer obtained from different content of reactive SiO<sub>2</sub> particles.

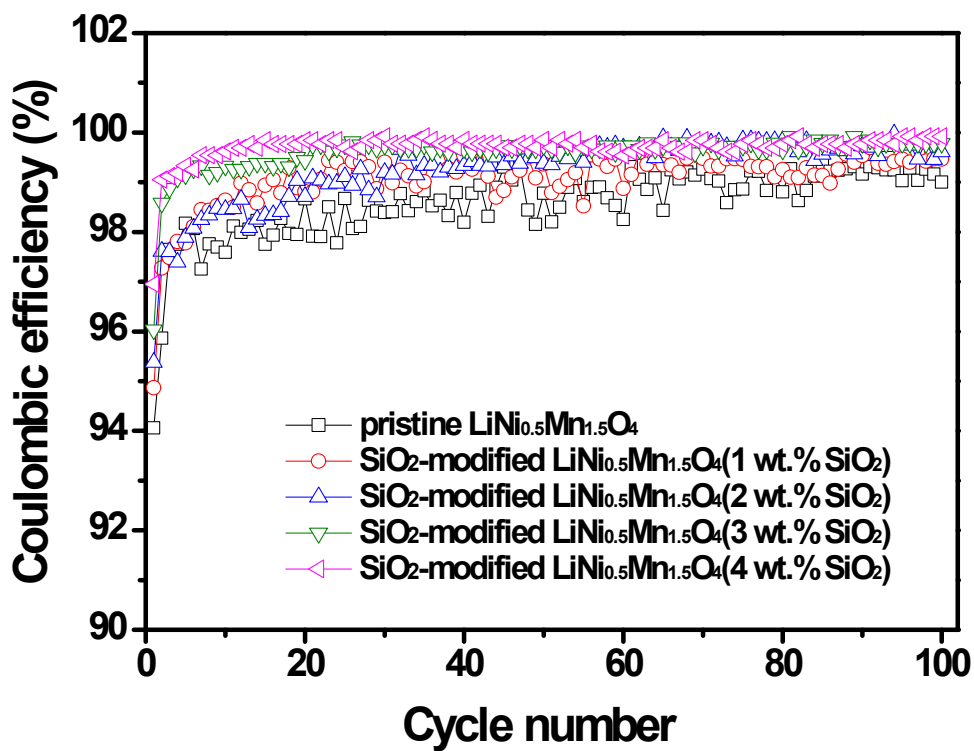

**Fig. S3.** Coulombic efficiencies of the Li/LiNi<sub>0.5</sub>Mn<sub>1.5</sub>O<sub>4</sub> cells assembled with the pristine LiNi<sub>0.5</sub>Mn<sub>1.5</sub>O<sub>4</sub> electrode and SiO<sub>2</sub>-modified LiNi<sub>0.5</sub>Mn<sub>1.5</sub>O<sub>4</sub> electrodes. (25 °C, 0.5C CC and CV charge, 0.5C CC discharge, cut-off: 3.0–4.9 V)

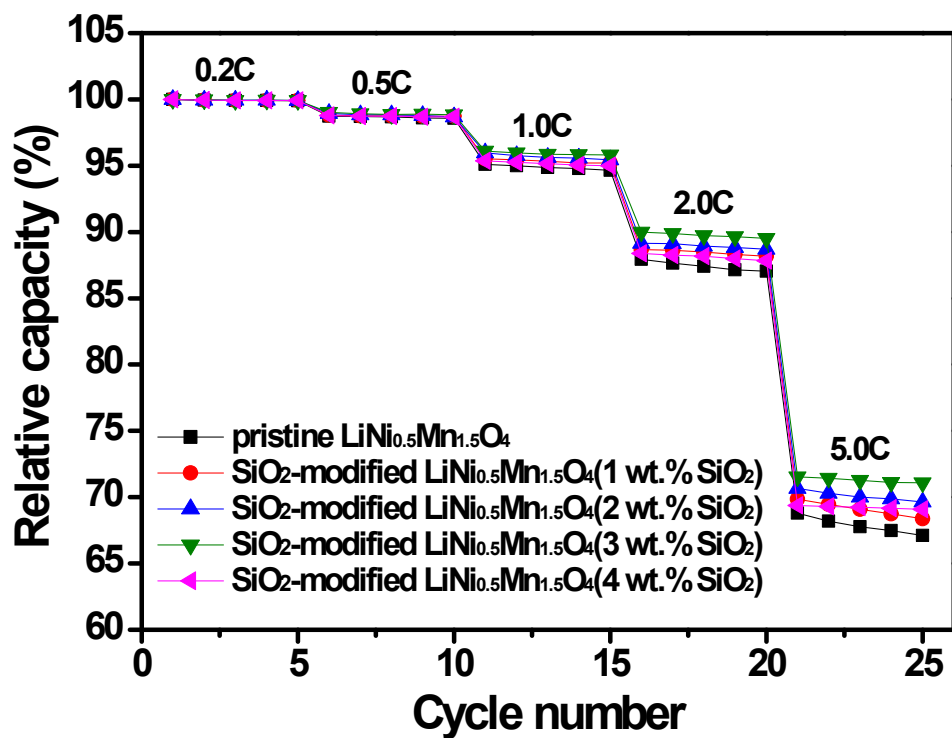

**Fig. S4.** Cycling performance of the Li/LiNi<sub>0.5</sub>Mn<sub>1.5</sub>O<sub>4</sub> cells at different current rates. The C-rate was increased from 0.2 to 5.0C after every 5 cycles.
